# Supplementary material for: Familial Alzheimer’s disease mutations at position 22 of the amyloid β-peptide sequence differentially affect synaptic loss, tau phosphorylation and neuronal cell death in an ex vivo system
Source: PubMed Central journal article supplement (PMC7510992; doi:10.1371/journal.pone.0239584), 2020-09-23
Supplement: pone.0239584.s001.pdf [file pone.0239584.s001.pdf]

**RAW Data for Figure 1:**

**Dendritic spine density:**

| Tg2576-wt | non-tg | ArcA $\beta$ -wt | non-tg | E22 $\Delta$ A $\beta$ -wt | non-tg | ArcA $\beta$ -wt<br>+DAPT | non-tg<br>+DAPT |
|-----------|--------|------------------|--------|----------------------------|--------|---------------------------|-----------------|
| 1         | 0.42   | 0.78             | 0.5    | 1.08                       | 1.18   | 0.97                      | 0.9             |
| 1.05      | 0.43   | 0.86             | 0.4    | 0.95                       | 1.09   | 0.9                       | 0.84            |
| 0.97      | 0.3    | 0.82             | 0.34   | 1.15                       | 1.06   | 1.02                      | 1.22            |
| 1.08      | 0.49   | 1.2              | 0.36   | 1.18                       | 1.14   | 1.03                      | 1.43            |
| 0.47      | 0.36   | 1                | 0.4    | 1.08                       | 0.88   | 1                         | 0.89            |
| 1.39      | 0.64   | 1.28             | 0.63   | 1.03                       | 1.1    | 1.17                      | 1.23            |
| 1.34      | 0.62   | 0.99             | 0.64   | 0.91                       | 1.09   | 1.01                      | 1.06            |
| 0.85      | 0.37   | 1.17             | 0.66   | 0.88                       | 0.85   | 1.1                       | 0.97            |
| 1.17      | 0.59   | 1.29             | 0.89   | 0.8                        | 0.93   | 1.09                      | 1               |
| 0.96      | 0.47   | 1.08             | 0.8    | 0.86                       | 0.87   | 1.04                      | 0.94            |
| 1.21      | 0.87   |                  | 0.81   | 0.94                       | 0.91   |                           |                 |
| 1.24      | 0.79   |                  | 0.66   | 0.79                       | 0.77   |                           |                 |

**Statistical analysis for Figure 1:  
one-way ANOVA with Tukey's multiple comparison test  
GraphPad Prism 7.01**

| Sample comparison                                              | Mean Diff. | Significant? | Summary | Adjusted P Value |
|----------------------------------------------------------------|------------|--------------|---------|------------------|
| Tg2576-non-tg vs. Tg2576-tg                                    | 0.532      | Yes          | ****    | <0.0001          |
| Tg2576-non-tg vs. ArcA $\beta$ -non-tg                         | 0.0138     | No           | ns      | >0.9999          |
| Tg2576-non-tg vs. ArcA $\beta$ -tg                             | 0.47       | Yes          | ****    | <0.0001          |
| Tg2576-non-tg vs. E22 $\Delta$ A $\beta$ -non-tg               | 0.09       | No           | ns      | 0.9079           |
| Tg2576-non-tg vs. E22 $\Delta$ A $\beta$ -tg                   | 0.0717     | No           | ns      | 0.9717           |
| Tg2576-non-tg vs. ArcA $\beta$ -non-tg + DAPT                  | 0.0278     | No           | ns      | >0.9999          |
| Tg2576-non-tg vs. ArcA $\beta$ -tg + DAPT                      | 0.0128     | No           | ns      | >0.9999          |
| Tg2576-tg vs. ArcA $\beta$ -non-tg                             | -0.518     | Yes          | ****    | <0.0001          |
| Tg2576-tg vs. ArcA $\beta$ -tg                                 | -0.0617    | No           | ns      | 0.988            |
| Tg2576-tg vs. E22 $\Delta$ A $\beta$ -non-tg                   | -0.442     | Yes          | ****    | <0.0001          |
| Tg2576-tg vs. E22 $\Delta$ A $\beta$ -tg                       | -0.46      | Yes          | ****    | <0.0001          |
| Tg2576-tg vs. ArcA $\beta$ -non-tg + DAPT                      | -0.504     | Yes          | ****    | <0.0001          |
| Tg2576-tg vs. ArcA $\beta$ -tg + DAPT                          | -0.519     | Yes          | ****    | <0.0001          |
| ArcA $\beta$ -non-tg vs. ArcA $\beta$ -tg                      | 0.456      | Yes          | ****    | <0.0001          |
| ArcA $\beta$ -non-tg vs. E22 $\Delta$ A $\beta$ -non-tg        | 0.0762     | No           | ns      | 0.9696           |
| ArcA $\beta$ -non-tg vs. E22 $\Delta$ A $\beta$ -tg            | 0.0578     | No           | ns      | 0.9939           |
| ArcA $\beta$ -non-tg vs. ArcA $\beta$ -non-tg + DAPT           | 0.014      | No           | ns      | >0.9999          |
| ArcA $\beta$ -non-tg vs. ArcA $\beta$ -tg + DAPT               | -0.001     | No           | ns      | >0.9999          |
| ArcA $\beta$ -tg vs. E22 $\Delta$ A $\beta$ -non-tg            | -0.38      | Yes          | ****    | <0.0001          |
| ArcA $\beta$ -tg vs. E22 $\Delta$ A $\beta$ -tg                | -0.398     | Yes          | ****    | <0.0001          |
| ArcA $\beta$ -tg vs. ArcA $\beta$ -non-tg + DAPT               | -0.442     | Yes          | ****    | <0.0001          |
| ArcA $\beta$ -tg vs. ArcA $\beta$ -tg + DAPT                   | -0.457     | Yes          | ****    | <0.0001          |
| E22 $\Delta$ A $\beta$ -non-tg vs. E22 $\Delta$ A $\beta$ -tg  | -0.0183    | No           | ns      | >0.9999          |
| E22 $\Delta$ A $\beta$ -non-tg vs. ArcA $\beta$ -non-tg + DAPT | -0.0622    | No           | ns      | 0.9905           |
| E22 $\Delta$ A $\beta$ -non-tg vs. ArcA $\beta$ -tg + DAPT     | -0.0772    | No           | ns      | 0.9673           |
| E22 $\Delta$ A $\beta$ -tg vs. ArcA $\beta$ -non-tg + DAPT     | -0.0438    | No           | ns      | 0.9989           |
| E22 $\Delta$ A $\beta$ -tg vs. ArcA $\beta$ -tg + DAPT         | -0.0588    | No           | ns      | 0.9932           |
| ArcA $\beta$ -non-tg + DAPT vs. ArcA $\beta$ -tg + DAPT        | -0.015     | No           | ns      | >0.9999          |

Tg2576-non-tg refers to the non-transgenic littermates of the Tg2576-tg mice.  
ArcA $\beta$ -non-tg refers to the non-transgenic littermates of the ArcA $\beta$ -tg mice.  
E22 $\Delta$ A $\beta$ -non-tg refers to the non-transgenic littermates of the E22 $\Delta$ A $\beta$ -tg mice.

**RAW Data for Figure 2:**

**Dendritic spine density:**

| untreated | vehicle | wt A $\beta$ 42 | E22G A $\beta$ 42 | E22 $\Delta$ A $\beta$ 42 | wt A $\beta$ 40 | E22G A $\beta$ 40 | E22 $\Delta$ A $\beta$ 42 |
|-----------|---------|-----------------|-------------------|---------------------------|-----------------|-------------------|---------------------------|
| 1.27      | 0.8     | 0.66            | 0.38              | 1.3                       | 0.72            | 0.89              | 1.23                      |
| 1.02      | 1.23    | 0.41            | 0.41              | 0.71                      | 0.85            | 0.85              | 0.83                      |
| 1.29      | 1.19    | 0.79            | 0.64              | 1.07                      | 0.94            | 0.89              | 0.97                      |
| 1.09      | 1.1     | 0.92            | 0.77              | 0.99                      | 1               | 0.89              | 1.05                      |
| 1.15      | 1.12    | 0.56            | 0.65              | 1.26                      | 0.84            | 0.83              | 0.76                      |
| 1.1       | 0.92    | 0.35            | 0.46              | 1.03                      | 0.94            | 1.11              | 1.32                      |
| 1.19      | 1.02    | 0.82            | 0.31              | 1.24                      | 0.96            | 0.94              | 0.86                      |
| 1.15      | 1.19    | 0.68            | 0.73              | 1.3                       | 0.91            | 0.91              | 0.9                       |
| 1.02      | 1.02    | 0.79            | 0.31              | 1.21                      | 0.89            | 0.66              | 1.16                      |
| 0.99      |         | 0.85            | 0.87              | 0.88                      | 1.07            | 0.69              | 0.87                      |
| 1.17      |         |                 |                   | 1.33                      |                 | 1                 | 1.18                      |
| 1.09      |         |                 |                   | 1.39                      |                 |                   | 1.17                      |
|           |         |                 |                   | 1.06                      |                 |                   |                           |
|           |         |                 |                   | 0.9                       |                 |                   |                           |
|           |         |                 |                   | 0.76                      |                 |                   |                           |

**Statistical analysis for Figure 2:  
one-way ANOVA with Tukey's multiple comparison test  
GraphPad Prism 7.01**

| Sample comparison                              | Mean Diff. | Significant? | Summary | Adjusted P Value |
|------------------------------------------------|------------|--------------|---------|------------------|
| untreated vs. vehicle                          | 0.0619     | No           | ns      | 0.9896           |
| untreated vs. wt A $\beta$ 42                  | 0.445      | Yes          | ****    | <0.0001          |
| untreated vs. E22GA $\beta$ 42                 | 0.575      | Yes          | ****    | <0.0001          |
| untreated vs. E22 $\Delta$ A $\beta$ 42        | 0.0322     | No           | ns      | 0.9996           |
| untreated vs. wt 40                            | 0.216      | No           | ns      | 0.0604           |
| untreated vs. E22G40                           | 0.249      | Yes          | *       | 0.0119           |
| untreated vs. E22 $\Delta$ 40                  | 0.103      | No           | ns      | 0.7964           |
| vehicle vs. wt A $\beta$ 42                    | 0.383      | Yes          | ****    | <0.0001          |
| vehicle vs. E22GA $\beta$ 42                   | 0.513      | Yes          | ****    | <0.0001          |
| vehicle vs. E22 $\Delta$ A $\beta$ 42          | -0.0298    | No           | ns      | 0.9999           |
| vehicle vs. wt 40                              | 0.154      | No           | ns      | 0.4762           |
| vehicle vs. E22G40                             | 0.187      | No           | ns      | 0.203            |
| vehicle vs. E22 $\Delta$ 40                    | 0.0406     | No           | ns      | 0.9993           |
| wt A $\beta$ 42 vs. E22GA $\beta$ 42           | 0.13       | No           | ns      | 0.6512           |
| wt A $\beta$ 42 vs. E22 $\Delta$ A $\beta$ 42  | -0.412     | Yes          | ****    | <0.0001          |
| wt A $\beta$ 42 vs. wt 40                      | -0.229     | No           | ns      | 0.0526           |
| wt A $\beta$ 42 vs. E22G40                     | -0.195     | No           | ns      | 0.1382           |
| wt A $\beta$ 42 vs. E22 $\Delta$ 40            | -0.342     | Yes          | ***     | 0.0002           |
| E22GA $\beta$ 42 vs. E22 $\Delta$ A $\beta$ 42 | -0.542     | Yes          | ****    | <0.0001          |
| E22GA $\beta$ 42 vs. wt 40                     | -0.359     | Yes          | ***     | 0.0002           |
| E22GA $\beta$ 42 vs. E22G40                    | -0.325     | Yes          | ***     | 0.0006           |
| E22GA $\beta$ 42 vs. E22 $\Delta$ 40           | -0.472     | Yes          | ****    | <0.0001          |
| E22 $\Delta$ A $\beta$ 42 vs. wt 40            | 0.183      | No           | ns      | 0.1338           |
| E22 $\Delta$ A $\beta$ 42 vs. E22G40           | 0.217      | Yes          | *       | 0.0294           |
| E22 $\Delta$ A $\beta$ 42 vs. E22 $\Delta$ 40  | 0.0703     | No           | ns      | 0.9557           |
| wt 40 vs. E22G40                               | 0.0338     | No           | ns      | 0.9998           |
| wt 40 vs. E22 $\Delta$ 40                      | -0.113     | No           | ns      | 0.7525           |
| E22G40 vs. E22 $\Delta$ 40                     | -0.147     | No           | ns      | 0.4086           |

**RAW Data for Figure 3:****A:****Cytotoy Assay (rel. Units):**

| Tg2576-wt | non-tg | ArcA $\beta$ -wt | non-tg | E22 $\Delta$ A $\beta$ -wt | non-tg |
|-----------|--------|------------------|--------|----------------------------|--------|
| 21.00     | 45.00  | 27.36            | 30.62  | 29.98                      | 36.16  |
| 23.00     | 48.00  | 27.36            | 39.91  | 30.87                      | 40.57  |
| 15.00     | 38.00  | 26.71            | 29.96  | 28.22                      | 36.16  |
| 19.00     | 39.00  | 24.75            | 31.27  | 22.93                      | 20.28  |
| 26.00     | 36.00  | 24.75            | 31.27  | 23.81                      | 22.05  |
| 28.00     | 38.00  | 25.40            | 31.92  | 22.93                      | 21.17  |
| 23.00     | 40.00  | 24.10            | 31.92  | 17.64                      | 14.99  |
| 26.00     | 38.00  | 23.45            | 32.57  | 18.52                      | 17.64  |
| 30.00     | 44.00  | 24.10            | 31.92  | 30.87                      | 35.28  |
| 32.00     | 40.00  |                  | 39.08  | 29.10                      | 44.10  |
| 29.00     | 36.00  |                  |        | 28.22                      | 39.69  |
| 32.00     | 37.00  |                  |        | 22.05                      | 24.69  |
|           |        |                  |        | 22.93                      | 22.93  |
|           |        |                  |        | 22.93                      | 23.81  |
|           |        |                  |        | 18.52                      | 16.76  |
|           |        |                  |        |                            | 17.64  |

**B:****Cytotoy Assay:**

| untreated | vehicle | wt A $\beta$ 42 | E22G A $\beta$ 42 | E22 $\Delta$ A $\beta$ 42 | wt A $\beta$ 40 | E22G A $\beta$ 40 | E22 $\Delta$ A $\beta$ 42 |
|-----------|---------|-----------------|-------------------|---------------------------|-----------------|-------------------|---------------------------|
| 18.20     | 20.01   | 26.20           | 26.36             | 20.32                     | 23.46           | 24.99             | 14.79                     |
| 19.32     | 19.20   | 27.11           | 25.92             | 18.00                     | 23.46           | 17.34             | 13.26                     |
| 22.33     | 21.69   | 26.79           | 24.00             | 22.96                     | 21.93           | 25.50             | 20.40                     |
| 21.05     | 22.33   | 27.43           | 21.85             | 19.77                     | 23.46           | 24.48             | 18.36                     |
| 18.43     | 19.28   | 27.85           | 25.28             | 21.00                     | 15.81           | 20.40             | 19.89                     |
| 18.00     | 18.85   | 28.28           | 25.71             | 21.43                     | 17.85           | 21.93             | 18.87                     |
| 18.85     | 21.00   | 25.71           | 27.42             | 24.00                     | 22.44           | 20.40             | 20.91                     |
| 19.28     | 20.14   | 24.85           | 26.14             | 21.43                     | 21.42           | 19.38             | 22.95                     |
| 21.43     | 22.28   | 26.14           |                   | 24.00                     | 20.40           | 13.26             | 23.46                     |
| 21.43     | 21.85   | 26.57           |                   | 23.14                     | 17.85           | 14.79             | 24.48                     |

**C:**

**Cytotox Assay:**

| untreated | vehicle | wt A $\beta$ 42 | E22G A $\beta$ 42 | E22 $\Delta$ A $\beta$ 42 |
|-----------|---------|-----------------|-------------------|---------------------------|
| 16.0      | 18.0    | 18.0            | 17.0              | 17.0                      |
| 17.0      | 20.0    | 18.0            | 16.0              | 20.0                      |
| 20.8      | 17.6    | 15.1            | 16.4              | 17.0                      |
| 17.0      | 15.8    | 16.4            | 18.3              | 17.0                      |
| 17.0      | 17.0    | 15.8            | 18.3              | 18.9                      |

**D:**

**Western blot (rel. Units):**

| untreated  | vehicle    | wt A $\beta$ 42 | E22G A $\beta$ 42 | E22 $\Delta$ A $\beta$ 42 |
|------------|------------|-----------------|-------------------|---------------------------|
| 0.10252457 | 0.09637935 | 0.5991973       | 0.3733438         | 0.09514805                |
| 0.08933795 | 0.22133976 | 0.24085441      | 0.25506339        | 0.08536898                |
| 0.09015963 | 0.0845228  | 0.48206893      | 0.43752766        | 0.07526084                |
| 0.06408804 | 0.06545653 | 0.26741373      | 0.23066941        | 0.05850462                |

**Statistical analysis for Figure 3:  
one-way ANOVA with Tukey's multiple comparison test  
GraphPad Prism 7.01**

**A:**

| Sample comparison                             | Mean Diff. | Significant? | Summary | Adjusted P Value |
|-----------------------------------------------|------------|--------------|---------|------------------|
| Tg2576-non-tg vs. Tg2576-tg                   | -14.6      | Yes          | ****    | <0.0001          |
| Tg2576-non-tg vs. ArcA $\beta$ -non-tg        | 0.00111    | No           | ns      | >0.9999          |
| Tg2576-non-tg vs. ArcA $\beta$ -tg            | -7.71      | Yes          | *       | 0.0339           |
| Tg2576-non-tg vs. E22 $\Delta$ -non-tg        | 0.699      | No           | ns      | 0.9996           |
| Tg2576-non-tg vs. E22 $\Delta$ -tg            | -1.79      | No           | ns      | 0.9666           |
| Tg2576-tg vs. ArcA $\beta$ -non-tg            | 14.6       | Yes          | ****    | <0.0001          |
| Tg2576-tg vs. ArcA $\beta$ -tg                | 6.87       | No           | ns      | 0.0792           |
| Tg2576-tg vs. E22 $\Delta$ -non-tg            | 15.3       | Yes          | ****    | <0.0001          |
| Tg2576-tg vs. E22 $\Delta$ -tg                | 12.8       | Yes          | ****    | <0.0001          |
| ArcA $\beta$ -non-tg vs. ArcA $\beta$ -tg     | -7.71      | No           | ns      | 0.0583           |
| ArcA $\beta$ -non-tg vs. E22 $\Delta$ -non-tg | 0.698      | No           | ns      | 0.9997           |
| ArcA $\beta$ -non-tg vs. E22 $\Delta$ -tg     | -1.79      | No           | ns      | 0.977            |
| ArcA $\beta$ -tg vs. E22 $\Delta$ -non-tg     | 8.41       | Yes          | **      | 0.0095           |
| ArcA $\beta$ -tg vs. E22 $\Delta$ -tg         | 5.93       | No           | ns      | 0.1341           |
| E22 $\Delta$ -non-tg vs. E22 $\Delta$ -tg     | -2.48      | No           | ns      | 0.8436           |

Tg2576-non-tg refers to the non-tragengenic littermates of the Tg2576-tg mice.

ArcA $\beta$ -non-tg refers to the non-tragengenic littermates of the ArcA $\beta$ -tg mice.

E22 $\Delta$ A $\beta$ -non-tg refers to the non-tragengenic littermates of the E22 $\Delta$ A $\beta$ -tg mice.



**B:**

| Sample comparison                                       | Mean Diff. | Significant? | Summary | Adjusted P Value |
|---------------------------------------------------------|------------|--------------|---------|------------------|
| untreated vs. vehicle                                   | -0.831     | No           | ns      | 0.9956           |
| untreated vs. wt A $\beta$ 42                           | -6.86      | Yes          | ****    | <0.0001          |
| untreated vs. E22GA $\beta$ 42                          | -5.5       | Yes          | ***     | 0.0005           |
| untreated vs. E22 $\Delta$ A $\beta$ 42                 | -1.77      | No           | ns      | 0.7666           |
| untreated vs. wt A $\beta$ 40                           | -0.976     | No           | ns      | 0.9883           |
| untreated vs. E22GA $\beta$ 40                          | -0.415     | No           | ns      | >0.9999          |
| untreated vs. E22 $\Delta$ A $\beta$ 40                 | 0.095      | No           | ns      | >0.9999          |
| vehicle vs. wt A $\beta$ 42                             | -6.03      | Yes          | ****    | <0.0001          |
| vehicle vs. E22GA $\beta$ 42                            | -4.67      | Yes          | **      | 0.0051           |
| vehicle vs. E22 $\Delta$ A $\beta$ 42                   | -0.942     | No           | ns      | 0.9905           |
| vehicle vs. wt A $\beta$ 40                             | -0.145     | No           | ns      | >0.9999          |
| vehicle vs. E22GA $\beta$ 40                            | 0.416      | No           | ns      | >0.9999          |
| vehicle vs. E22 $\Delta$ A $\beta$ 40                   | 0.926      | No           | ns      | 0.9914           |
| wt A $\beta$ 42 vs. E22GA $\beta$ 42                    | 1.36       | No           | ns      | 0.9471           |
| wt A $\beta$ 42 vs. E22 $\Delta$ A $\beta$ 42           | 5.09       | Yes          | ***     | 0.0007           |
| wt A $\beta$ 42 vs. wt A $\beta$ 40                     | 5.89       | Yes          | ****    | <0.0001          |
| wt A $\beta$ 42 vs. E22GA $\beta$ 40                    | 6.45       | Yes          | ****    | <0.0001          |
| wt A $\beta$ 42 vs. E22 $\Delta$ A $\beta$ 40           | 6.96       | Yes          | ****    | <0.0001          |
| E22GA $\beta$ 42 vs. E22 $\Delta$ A $\beta$ 42          | 3.73       | No           | ns      | 0.0516           |
| E22GA $\beta$ 42 vs. wt A $\beta$ 40                    | 4.53       | Yes          | **      | 0.0075           |
| E22GA $\beta$ 42 vs. E22GA $\beta$ 40                   | 5.09       | Yes          | **      | 0.0016           |
| E22GA $\beta$ 42 vs. E22 $\Delta$ A $\beta$ 40          | 5.6        | Yes          | ***     | 0.0004           |
| E22 $\Delta$ A $\beta$ 42 vs. wt A $\beta$ 40           | 0.797      | No           | ns      | 0.9966           |
| E22 $\Delta$ A $\beta$ 42 vs. E22GA $\beta$ 40          | 1.36       | No           | ns      | 0.9287           |
| E22 $\Delta$ A $\beta$ 42 vs. E22 $\Delta$ A $\beta$ 40 | 1.87       | No           | ns      | 0.7164           |
| wt A $\beta$ 40 vs. E22GA $\beta$ 40                    | 0.561      | No           | ns      | 0.9996           |
| wt A $\beta$ 40 vs. E22 $\Delta$ A $\beta$ 40           | 1.07       | No           | ns      | 0.98             |
| E22GA $\beta$ 40 vs. E22 $\Delta$ A $\beta$ 40          | 0.51       | No           | ns      | 0.9998           |

C:

| Sample comparison                              | Mean Diff. | Significant? | Summary | Adjusted P Value |
|------------------------------------------------|------------|--------------|---------|------------------|
| untreated vs. vehicle                          | -0.118     | No           | ns      | >0.9999          |
| untreated vs. wt A $\beta$ 42                  | 0.912      | No           | ns      | 0.8572           |
| untreated vs. E22GA $\beta$ 42                 | 0.378      | No           | ns      | 0.9936           |
| untreated vs. E22 $\Delta$ A $\beta$ 42        | -0.422     | No           | ns      | 0.9903           |
| vehicle vs. wt A $\beta$ 42                    | 1.03       | No           | ns      | 0.7959           |
| vehicle vs. E22GA $\beta$ 42                   | 0.496      | No           | ns      | 0.9822           |
| vehicle vs. E22 $\Delta$ A $\beta$ 42          | -0.304     | No           | ns      | 0.9972           |
| wt A $\beta$ 42 vs. E22GA $\beta$ 42           | -0.534     | No           | ns      | 0.9767           |
| wt A $\beta$ 42 vs. E22 $\Delta$ A $\beta$ 42  | -1.33      | No           | ns      | 0.6065           |
| E22GA $\beta$ 42 vs. E22 $\Delta$ A $\beta$ 42 | -0.8       | No           | ns      | 0.9054           |

D:

| Sample comparison                              | Mean Diff. | Significant? | Summary | Adjusted P Value |
|------------------------------------------------|------------|--------------|---------|------------------|
| untreated vs. vehicle                          | -0.0304    | No           | ns      | 0.9903           |
| untreated vs. wt A $\beta$ 42                  | -0.311     | Yes          | **      | 0.0025           |
| untreated vs. E22GA $\beta$ 42                 | -0.238     | Yes          | *       | 0.0209           |
| untreated vs. E22 $\Delta$ A $\beta$ 42        | 0.00796    | No           | ns      | >0.9999          |
| vehicle vs. wt A $\beta$ 42                    | -0.28      | Yes          | **      | 0.0061           |
| vehicle vs. E22GA $\beta$ 42                   | -0.207     | Yes          | *       | 0.0495           |
| vehicle vs. E22 $\Delta$ A $\beta$ 42          | 0.0384     | No           | ns      | 0.9772           |
| wt A $\beta$ 42 vs. E22GA $\beta$ 42           | 0.0732     | No           | ns      | 0.8073           |
| wt A $\beta$ 42 vs. E22 $\Delta$ A $\beta$ 42  | 0.319      | Yes          | **      | 0.002            |
| E22GA $\beta$ 42 vs. E22 $\Delta$ A $\beta$ 42 | 0.246      | Yes          | *       | 0.0166           |

**RAW Data for S1Figure:**

**A:**

**Dendritic spine density:**

| wt A $\beta$ 42 | wt A $\beta$ 40 | E22G A $\beta$ 42 | E22G A $\beta$ 40 | E22 $\Delta$ A $\beta$ 42 | E22 $\Delta$ A $\beta$ 42 |
|-----------------|-----------------|-------------------|-------------------|---------------------------|---------------------------|
| 0.66            | 0.72            | 0.38              | 0.89              | 1.3                       | 1.23                      |
| 0.41            | 0.85            | 0.41              | 0.85              | 0.71                      | 0.83                      |
| 0.79            | 0.94            | 0.64              | 0.89              | 1.07                      | 0.97                      |
| 0.92            | 1               | 0.77              | 0.89              | 0.99                      | 1.05                      |
| 0.56            | 0.84            | 0.65              | 0.83              | 1.26                      | 0.76                      |
| 0.35            | 0.94            | 0.46              | 1.11              | 1.03                      | 1.32                      |
| 0.82            | 0.96            | 0.31              | 0.94              | 1.24                      | 0.86                      |
| 0.68            | 0.91            | 0.73              | 0.91              | 1.3                       | 0.9                       |
| 0.79            | 0.89            | 0.31              | 0.66              | 1.21                      | 1.16                      |
| 0.85            | 1.07            | 0.87              | 0.69              | 0.88                      | 0.87                      |
|                 |                 |                   | 1                 | 1.33                      | 1.18                      |
|                 |                 |                   |                   | 1.39                      | 1.17                      |
|                 |                 |                   |                   | 1.06                      |                           |
|                 |                 |                   |                   | 0.9                       |                           |
|                 |                 |                   |                   | 0.76                      |                           |

**B:**

**Cytotox Assay**

| wt A $\beta$ 42 | wt A $\beta$ 40 | E22G A $\beta$ 42 | E22G A $\beta$ 40 | E22 $\Delta$ A $\beta$ 42 | E22 $\Delta$ A $\beta$ 42 |
|-----------------|-----------------|-------------------|-------------------|---------------------------|---------------------------|
| 26.2            | 23.46           | 26.36             | 24.99             | 20.32                     | 14.79                     |
| 27.11           | 23.46           | 25.92             | 17.34             | 18                        | 13.26                     |
| 26.79           | 21.93           | 24                | 25.5              | 22.96                     | 20.4                      |
| 27.43           | 23.46           | 21.85             | 24.48             | 19.77                     | 18.36                     |
| 27.85           | 15.81           | 25.28             | 20.4              | 21                        | 19.89                     |
| 28.28           | 17.85           | 25.71             | 21.93             | 21.43                     | 18.87                     |
| 25.71           | 22.44           | 27.42             | 20.4              | 24                        | 20.91                     |
| 24.85           | 21.42           | 26.14             | 19.38             | 21.43                     | 22.95                     |
| 26.14           | 20.4            |                   | 13.26             | 24                        | 23.46                     |
| 26.57           | 17.85           |                   | 14.79             | 23.14                     | 24.48                     |

**Statistical analysis for S1 Figure:  
one-way ANOVA with Tukey's multiple comparison test  
GraphPad Prism 7.01**

**A:**

| Sample comparison                                       | Mean Diff. | Significant? | Summary | Adjusted P Value |
|---------------------------------------------------------|------------|--------------|---------|------------------|
| wt A $\beta$ 42 vs. wt A $\beta$ 40                     | -0.229     | No           | ns      | 0.0586           |
| wt A $\beta$ 42 vs. E22GA $\beta$ 42                    | 0.13       | No           | ns      | 0.58             |
| wt A $\beta$ 42 vs. E22GA $\beta$ 40                    | -0.1952    | No           | ns      | 0.1369           |
| wt A $\beta$ 42 vs. E22 $\Delta$ A $\beta$ 42           | -0.4123    | Yes          | ****    | <0.0001          |
| wt A $\beta$ 42 vs. E22 $\Delta$ A $\beta$ 40           | -0.342     | Yes          | ***     | 0.0004           |
| wt A $\beta$ 40 vs. E22GA $\beta$ 42                    | 0.359      | Yes          | ***     | 0.0004           |
| wt A $\beta$ 40 vs. E22GA $\beta$ 40                    | 0.03382    | No           | ns      | 0.9979           |
| wt A $\beta$ 40 vs. E22 $\Delta$ A $\beta$ 42           | -0.1833    | No           | ns      | 0.1331           |
| wt A $\beta$ 40 vs. E22 $\Delta$ A $\beta$ 40           | -0.113     | No           | ns      | 0.6762           |
| E22GA $\beta$ 42 vs. E22GA $\beta$ 40                   | -0.3252    | Yes          | **      | 0.0012           |
| E22GA $\beta$ 42 vs. E22 $\Delta$ A $\beta$ 42          | -0.5423    | Yes          | ****    | <0.0001          |
| E22GA $\beta$ 42 vs. E22 $\Delta$ A $\beta$ 40          | -0.472     | Yes          | ****    | <0.0001          |
| E22GA $\beta$ 40 vs. E22 $\Delta$ A $\beta$ 42          | -0.2172    | Yes          | *       | 0.0354           |
| E22GA $\beta$ 40 vs. E22 $\Delta$ A $\beta$ 40          | -0.1468    | No           | ns      | 0.3674           |
| E22 $\Delta$ A $\beta$ 42 vs. E22 $\Delta$ A $\beta$ 40 | 0.07033    | No           | ns      | 0.9093           |

**B:**

| Sample comparison                                       | Mean Diff. | Significant? | Summary | Adjusted P Value |
|---------------------------------------------------------|------------|--------------|---------|------------------|
| wt A $\beta$ 42 vs. wt A $\beta$ 40                     | 5.885      | Yes          | ***     | 0.0003           |
| wt A $\beta$ 42 vs. E22GA $\beta$ 42                    | 1.358      | No           | ns      | 0.9086           |
| wt A $\beta$ 42 vs. E22GA $\beta$ 40                    | 6.446      | Yes          | ****    | <0.0001          |
| wt A $\beta$ 42 vs. E22 $\Delta$ A $\beta$ 42           | 5.088      | Yes          | **      | 0.0022           |
| wt A $\beta$ 42 vs. E22 $\Delta$ A $\beta$ 40           | 6.956      | Yes          | ****    | <0.0001          |
| wt A $\beta$ 40 vs. E22GA $\beta$ 42                    | -4.527     | Yes          | *       | 0.0153           |
| wt A $\beta$ 40 vs. E22GA $\beta$ 40                    | 0.561      | No           | ns      | 0.9976           |
| wt A $\beta$ 40 vs. E22 $\Delta$ A $\beta$ 42           | -0.797     | No           | ns      | 0.9877           |
| wt A $\beta$ 40 vs. E22 $\Delta$ A $\beta$ 40           | 1.071      | No           | ns      | 0.9554           |
| E22GA $\beta$ 42 vs. E22GA $\beta$ 40                   | 5.088      | Yes          | **      | 0.0045           |
| E22GA $\beta$ 42 vs. E22 $\Delta$ A $\beta$ 42          | 3.73       | No           | ns      | 0.0724           |
| E22GA $\beta$ 42 vs. E22 $\Delta$ A $\beta$ 40          | 5.598      | Yes          | **      | 0.0014           |
| E22GA $\beta$ 40 vs. E22 $\Delta$ A $\beta$ 42          | -1.358     | No           | ns      | 0.8857           |
| E22GA $\beta$ 40 vs. E22 $\Delta$ A $\beta$ 40          | 0.51       | No           | ns      | 0.9985           |
| E22 $\Delta$ A $\beta$ 42 vs. E22 $\Delta$ A $\beta$ 40 | 1.868      | No           | ns      | 0.6717           |
